# Supplementary material
Source: Elsevier journal article supplement (https://www.sciencedirect.com/science/article/pii/S2530018018300519)
Supplement: mmc1 [file S2530018018300519:mmc1.docx]

**Tabla 3. Cálculo de la dosis inicial de insulina prandial (14,15)**

| **Modalidades** | **Dosis inicial** |
| --- | --- |
| Dosis inicial fija | 4 U |
| Dosis en función de la insulina basal | 10% de la dosis de insulina basal |
| Dosis en función del peso corporal | 0,05 U/kg |
| Dosis en función de la glucemia posprandial | Glucemia (mmol/L) / 2  Glucemia (mg/dl) / 36 |

**Tabla 4. Ajuste de la insulina prandial (14,15)**

| **Modalidades** | **Ajustes** |
| --- | --- |
| Ajuste «de una en una» si la glucemia posprandial es superior al objetivo | GPP >180 mg/dL: aumentar 1 U |
| Según la dosis de insulina prandial, si la glucemia posprandial es superior al objetivo | Dosis ≤10 U: aumentar 1 U  Dosis 11-20 U: aumentar 2 U  Dosis >20 U: aumentar 3 U |
| Según niveles de glucemia posprandial | GPP <100: reducir 2 U  GPP 100-180 mg/dL: mantener la dosis  GPP 181-240 mg/dL: aumentar 2 U  GPP >240 mg/dL: aumentar 4 U |

**Tabla 6. Ajustes orientativos de las dosis de insulinas premezcladas**

| **Momento** | **Glucemia** | **Ajuste de dosis de la insulina previa** |
| --- | --- | --- |
| **Preprandial** | <90 mg/dl  90-130 mg/dl  130-140 mg/dl | -2 U  Misma dosis  + 1 U |
| 140-159 mg/dl | + 2 U |
| 160-179 mg/dl | + 3 U |
| 180-250 mg/dl | + 4 U |
|  |  |  |
| **Postprandial** | <100 mg/dl  100-180 mg/dl  180-219 mg/dl | -2 U  Misma dosis  + 2 U |
| 220-259 mg/dl | + 3 U |
| 260-299 mg/dl | + 4 U |
| > 300 mg/dl | + 7 U |

**Tabla 7. Estimación de la dosis de inicio de insulina en situaciones de hiperglucemia inducida por corticoides, según el preparado y la dosis de glucocorticoide. En ausencia de contraindicación, el tratamiento hipoglucemiante previo del paciente deberá mantenerse (33).**

| Dosis de prednisona / metilprednisolona (mg/día) | Dosis de dexametasona (mg/día) | Dosis de NPH / bifásica (U/kg) | Dosis de insulina glargina / detemir (U/kg) |
| --- | --- | --- | --- |
| ≥40 | ≥8 | 0,4 | 0,4 |
| 30 | 6 | 0,3 | 0,3 |
| 20 | 4 | 0,2 | 0,2 |
| 10 | 2 | 0,1 | 0,1 |

**Tabla 8. Adaptación del tratamiento en los pacientes tratados previamente con insulina, considerando la pauta habitual de glucocorticoides (33)**

| **Pauta de insulina habitual** | **1 dosis matutina de glucocorticoide de acción intermedia** | **2 dosis de glucocorticoide de acción intermedia** | **Glucocorticoides de acción prolongada/intraarticulares** |
| --- | --- | --- | --- |
| Monodosis nocturna de insulina NPH/bifásica | Añadir el incremento de dosis estimado en 1 dosis de insulina NPH/bifásica predesayuno | Añadir el incremento de dosis estimado como insulina NPH/bifásica: 2/3 predesayuno 1/3 precena | Añadir el incremento de dosis estimado como insulina NPH/bifásica: 2/3 predesayuno 1/3 precena |
| Insulina basal (glargina/detemir) | Añadir el incremento de dosis estimado en 1 dosis de insulina NPH predesayuno | Añadir el incremento de dosis estimado como: 2/3 insulina NPH predesayuno 1/3 dosis insulina basal precena | Añadir el incremento de dosis estimado como insulina basal |
| 2 dosis de insulina (NPH/bifásicas) | Añadir el incremento de dosis estimado como insulina NPH/bifásica predesayuno | Añadir el incremento de dosis estimado como insulina bifásica: 2/3 predesayuno 1/3 precena | Añadir el incremento de dosis estimado como insulina NPH/bifásica: 2/3 predesayuno 1/3 precena |
| Pauta de insulina basal-bolo | Añadir el incremento de dosis estimado como bolo: 20% desayuno 40% almuerzo 40% cena | Añadir el incremento de dosis estimado como: 25% basal 75% bolo (1/3 en cada comida) | Añadir el incremento de dosis estimado como: 25% basal 75% bolo (1/3 en cada comida) |
